# Supplementary material for: Case-Control Study of Risk Factors for Sporadic Giardiasis and Parasite Assemblages in North West England
Source: PubMed Central journal article supplement — J Clin Microbiol. 2015 Sep 16;53(10):3133–40. doi: 10.1128/JCM.00715-15 (PMC4572545; doi:10.1128/jcm.00715-15), 2015-09-16
Supplement: JCM.00715-15_zjm999094478so1.pdf [file JCM.00715-15_zjm999094478so1.pdf]

| <b>Variables</b>                                                          |                                        | <b>Cases</b>  | <b>Controls</b> | <b>OR (95% CI)**</b> | <b>p-value</b> |
|---------------------------------------------------------------------------|----------------------------------------|---------------|-----------------|----------------------|----------------|
|                                                                           |                                        | <b>n (%)*</b> | <b>n (%)*</b>   |                      |                |
| Suffering irritable bowel syndrome (IBS)                                  |                                        | 11 (10.3)     | 14 (6.6)        | 1.63 (0.71-3.72)     | 0.244          |
| Taking medicines for indigestion                                          |                                        | 37 (31.9)     | 50 (22.2)       | 1.64 (0.99-2.71)     | 0.052          |
| Swimming in a lake, pond or river                                         |                                        | 3 (2.9)       | 5 (2.3)         | 1.27 (0.30-5.41)     | 0.716          |
| Going camping                                                             |                                        | 2 (1.8)       | 3 (1.4)         | 1.28 (0.21-7.80)     | 1.000          |
| Walking in the countryside                                                |                                        | 39 (36.1)     | 93 (42.1)       | 0.78 (0.48-1.25)     | 0.300          |
| Going caravanning                                                         |                                        | 3 (2.8)       | 12 (5.7)        | 0.47 (0.13-1.70)     | 0.239          |
| Keeping a pet at home                                                     |                                        | 44 (37.9)     | 106 (46.9)      | 0.69 (0.44-1.09)     | 0.113          |
| Visiting or working at a farm                                             |                                        | 13 (11.4)     | 34 (15)         | 0.73 (0.37-1.44)     | 0.358          |
| Touching animals while visiting or working at a farm                      | Neither visiting nor working at a farm | 101 (88.6)    | 192 (85.3)      | Reference            | 0.659          |
|                                                                           | Not touching animals while at a farm   | 4 (3.5)       | 12 (5.3)        | 0.63 (0.20-2.01)     |                |
|                                                                           | Touching animals while at a farm       | 9 (7.9)       | 21 (9.3)        | 0.81 (0.36-1.84)     |                |
| Visiting any other animal premise (excluding farms, wildlife parks, zoos) |                                        | 2 (1.8)       | 14 (6.2)        | 0.27 (0.06-1.20)     | 0.067          |
| Touching any animal in the wild                                           |                                        | 6 (5.7)       | 5 (2.7)         | 2.18 (0.65-7.34)     | 0.214          |
| Drinking un-boiled water straight from                                    |                                        | 102           | 200 (88.9)      | 1.06 (0.51-2.20)     | 0.870          |

|                                                       |                                         |           |            |                   |       |
|-------------------------------------------------------|-----------------------------------------|-----------|------------|-------------------|-------|
| the tap                                               |                                         | (89.5)    |            |                   |       |
| No. glasses of un-boiled tap water per day            | 0                                       | 10 (9.6)  | 22 (10.1)  | Reference         | 0.496 |
|                                                       | 1-2                                     | 46 (44.2) | 98 (45.2)  | 1.03 (0.45-2.36)  |       |
|                                                       | 3-4                                     | 31 (29.8) | 60 (27.6)  | 1.14 (0.48-2.70)  |       |
|                                                       | 5+                                      | 17 (16.3) | 37 (17.1)  | 1.01 (0.39-2.59)  |       |
| Water from the tap reported having an unusual taste   |                                         | 5 (4.4)   | 3 (1.4)    | 3.33 (0.78-14.21) | 0.127 |
| Water from the tap reported discoloured               |                                         | 6 (5.3)   | 4 (1.8)    | 3.01 (0.83-10.90) | 0.095 |
| Drinking un-boiled water from a lake, river or stream |                                         | 2 (1.9)   | 2 (1)      | 1.91 (0.27-13.78) | 0.611 |
| Children at nursery/ playgroup                        | No children                             | 60 (53.1) | 134 (59.3) | Reference         | 0.054 |
|                                                       | Children not at nursery/playgroup       | 19 (16.8) | 50 (22.1)  | 0.85 (0.46-1.56)  |       |
|                                                       | At least one child at nursery/playgroup | 34 (30.1) | 42 (18.6)  | 1.81 (1.05-3.12)  |       |
| Children in nappies                                   | No children                             | 60 (52.6) | 134 (59.8) | Reference         | 0.095 |
|                                                       | Children not in nappies                 | 23 (20.2) | 52 (23.2)  | 0.99 (0.55-1.76)  |       |
|                                                       | Children in nappies                     | 31 (27.2) | 38 (17)    | 1.82 (1.04-3.20)  |       |
| Changing nappies                                      | No children or children not in nappies  | 83 (74.1) | 186 (83.4) | Reference         | 0.064 |

|  |                                              |           |           |                  |       |
|--|----------------------------------------------|-----------|-----------|------------------|-------|
|  | Children in nappies but not changing nappies | 9 (8)     | 17 (7.6)  | 1.19 (0.51-2.77) |       |
|  | Children in nappies and changing nappies     | 20 (17.9) | 20 (9)    | 2.24 (1.14-4.39) |       |
|  | Another diarrhoeic person in the house       | 18 (16.4) | 23 (10.9) | 1.60 (0.82-3.11) | 0.164 |

\*percentages refer to the proportion among participants that answered the question; ~Asia, Africa, Central and South America; \*\*odds ratio with 95% confidence interval.

**Table S1:** Non significant ( $p \geq 0.05$ ) variables in univariable analysis in all the eligible 118 cases and 226 controls.
