# Supplementary material for: Case-Control Study of Risk Factors for Sporadic Giardiasis and Parasite Assemblages in North West England
Source: PubMed Central journal article supplement — J Clin Microbiol. 2015 Sep 16;53(10):3133–40. doi: 10.1128/JCM.00715-15 (PMC4572545; doi:10.1128/jcm.00715-15), 2015-09-16
Supplement: JCM.00715-15_zjm999094478so2.pdf [file JCM.00715-15_zjm999094478so2.pdf]

| <b>Variables</b>                                     |                                        | <b>Cases</b>  | <b>Controls</b> | <b>OR (95% CI)**</b> | <b>p-value</b> |
|------------------------------------------------------|----------------------------------------|---------------|-----------------|----------------------|----------------|
|                                                      |                                        | <b>n (%)*</b> | <b>n (%)*</b>   |                      |                |
| Suffering irritable bowel syndrome (IBS)             |                                        | 9 (11.5)      | 12 (6.2)        | 1.99 (0.80-4.93)     | 0.131          |
| Taking medicines for indigestion                     |                                        | 26 (31)       | 47 (22.8)       | 1.52 (0.86-2.67)     | 0.148          |
| Swimming in a lake, pond or river                    |                                        | 1 (1.3)       | 4 (2)           | 0.64 (0.07-5.82)     | 1.000          |
| Going camping                                        |                                        | 0 (0)         | 3 (1.6)         | n/a***               | 0.557          |
| Going caravanning                                    |                                        | 2 (2.5)       | 12 (6.2)        | 0.38 (0.08-1.75)     | 0.244          |
| Walking in the countryside                           |                                        | 30<br>(37.5)  | 82 (40.6)       | 0.88 (0.51-1.50)     | 0.632          |
| Keeping a pet at home                                |                                        | 34<br>(40.5)  | 99 (47.8)       | 0.74 (0.44-1.24)     | 0.254          |
| Touching any pet (own or other people's)             |                                        | 43<br>(54.4)  | 116<br>(61.1)   | 0.76 (0.45-1.29)     | 0.314          |
| Visiting or working at a farm                        |                                        | 11<br>(12.9)  | 31 (15)         | 0.84 (0.40-1.77)     | 0.653          |
| Touching animals while visiting or working at a farm | Neither visiting nor working at a farm | 74<br>(87.1)  | 176<br>(85.4)   | Reference            | 0.936          |
|                                                      | Not touching animals while at a farm   | 4 (4.7)       | 12 (5.3)        | 0.86 (0.27-2.80)     |                |
|                                                      | Touching animals while at a farm       | 7 (8.2)       | 19 (9.2)        | 0.88 (0.35-2.17)     |                |
| Visiting or working at a wildlife park or            |                                        | 6 (7.1)       | 8 (3.9)         | 1.88 (0.63-5.59)     | 0.245          |

|                                                                              |                            |              |               |                   |       |
|------------------------------------------------------------------------------|----------------------------|--------------|---------------|-------------------|-------|
| zoo                                                                          |                            |              |               |                   |       |
| Visiting any other animal premise<br>(excluding farms, wildlife parks, zoos) |                            | 1 (1.2)      | 14 (6.8)      | 0.16 (0.02-1.28)  | 0.075 |
| Touching any animal in the wild                                              |                            | 2 (2.5)      | 3 (1.7)       | 1.45 (0.24-8.87)  | 0.653 |
| Drinking un-boiled water straight from<br>the tap                            |                            | 80<br>(95.2) | 185<br>(89.8) | 2.27 (0.75-6.83)  | 0.135 |
| No. glasses of<br>un-boiled tap<br>water per day                             | 0                          | 4 (5.2)      | 21 (10.5)     | Reference         | 0.341 |
|                                                                              | 1-2                        | 36<br>(46.8) | 91 (45.5)     | 2.08 (0.67-6.47)  |       |
|                                                                              | 3-4                        | 25<br>(32.5) | 54 (27)       | 2.43 (0.76-7.83)  |       |
|                                                                              | 5+                         | 12<br>(15.6) | 34 (17)       | 1.85 (0.53-6.50)  |       |
| Water from the tap reported having an<br>unusual taste                       |                            | 4 (4.8)      | 3 (1.5)       | 3.36 (0.73-15.35) | 0.199 |
| Water from the tap reported discoloured                                      |                            | 4 (4.8)      | 4 (2)         | 2.51 (0.61-10.27) | 0.237 |
| Drinking un-boiled water from a lake,<br>river or stream                     |                            | 1 (1.3)      | 2 (1.1)       | 1.19 (0.11-13.30) | 1.000 |
| Children in<br>nappies                                                       | No children                | 42<br>(49.4) | 121<br>(58.7) | Reference         | 0.123 |
|                                                                              | Children not in<br>nappies | 19<br>(22.4) | 49 (23.8)     | 1.12 (0.59-2.11)  |       |
|                                                                              | Children in nappies        | 24<br>(28.2) | 36 (17.5)     | 1.92 (1.03-3.59)  |       |

|                                        |              |           |                  |       |
|----------------------------------------|--------------|-----------|------------------|-------|
| Another diarrhoeic person in the house | 15<br>(18.5) | 20 (10.3) | 1.99 (0.96-4.11) | 0.060 |
|----------------------------------------|--------------|-----------|------------------|-------|

\*percentages refer to the proportion among participants that answered the question; \*\*odds ratio with 95% confidence interval; \*\*\*odds ratio not calculated because no variation present in the data.

**Table S2:** Non significant ( $p \geq 0.05$ ) variables in univariable analysis in the subset of 86 cases and 207 controls that did not report travelling abroad.
